# Supplementary material for: Roles of C/EBP class bZip proteins in the growth and cell competition of Rp (‘Minute’) mutants in Drosophila
Source: eLife. 2020 Jan 7;9:e50535. doi: 10.7554/eLife.50535 (PMC6946401; doi:10.7554/eLife.50535)
Supplement: Figure 1—source data 1. [file elife-50535-fig1-data1.xlsx]

## Sheet: Sheet1
wt clones in RpS18[+/-] discs	pouch size	clone size		clone/pouch
	4.161	3.818		0.917568
	4.869	4.073		0.836517
	6.354	5.141		0.809097
	5.14	4.434		0.862646
mean	5.131	4.367		0.856
std dev	0.913848			0.0462366
sem				0.0231183
CG6272 clones in RpS18{+/-] CG6272 discs	3.783	0.491		0.129791
	5.396	1.287		0.23851
	5.236	0.87		0.166157
	4.382	0.776		0.177088
	5.756	1.413		0.245483
mean	4.911	0.967		0.191406
std dev	0.807326			0.049452
sem				0.0221156
F-test Difference in wing pouch	0.789078
t-test difference in ouch size	0.712058
F-test, difference in clone/pouch	0.94995
t-test, differences in clone/pouch	1.58848e-07
