# Supplementary material for: Roles of C/EBP class bZip proteins in the growth and cell competition of Rp (‘Minute’) mutants in Drosophila
Source: eLife. 2020 Jan 7;9:e50535. doi: 10.7554/eLife.50535 (PMC6946401; doi:10.7554/eLife.50535)
Supplement: Figure 1—source data 2. [file elife-50535-fig1-data2.xlsx]

## Sheet: Sheet1
cg6272 clones in wt	clone/twin	log2	antilog
	0.99	-0.0144996
	1.17	0.226509
	1.16	0.214125
	0.98	-0.0291463
	0.87	-0.200913
	0.89	-0.168123
	1.02	0.0285692
mean		0.00807445	1.00561
sd		0.166936
sem		0.063096
mean-sem		-0.0550215	0.96258
mean+sem		0.0711704	1.05057
cg6272 in RpS18	12.23	3.61235
	8.317	3.05606
	6.624	2.7277
	5.645	2.49697
	9.757	3.28644
	7.458	2.89879
	9.687	3.27605
	5.823	2.54176
	5.01	2.32481
mean		2.91344	7.53411
sd		0.428984
sem		0.142995
mean-sem		2.77044	6.82318
mean+sem		3.05643	8.31913
F test	0.0334705
t-test	1.38701e-09
