# Supplementary material for: Roles of C/EBP class bZip proteins in the growth and cell competition of Rp (‘Minute’) mutants in Drosophila
Source: eLife. 2020 Jan 7;9:e50535. doi: 10.7554/eLife.50535 (PMC6946401; doi:10.7554/eLife.50535)
Supplement: Figure 2—source data 1. [file elife-50535-fig2-data1.xlsx]

## Sheet: Sheet1
	clone areas		clone areas			R/G	log2(r/g)	antilog
190106w10r	1452	190106w10g	7183			0.202144	-2.30655
190106w9r	2003	190106w9g	1330			1.50602	0.590736
190106w8r	3213	190106w8g	4213			0.762639	-0.390927			F-test w vs Xrp1	0.728332
190106w7r	2038	190106w7g	5273			0.386497	-1.37147			t-test w vs xrp1	3.36205e-05
190106w6r	5440	190106w6g	4143			1.31306	0.392931
190106w5r	3290	190106w5g	1464			2.24727	1.16817
190106w4r	6040	190106w4g	4408			1.37024	0.454424
190106w3r	7735	190106w3g	8588			0.900675	-0.150921
190106w2r	1904	190106w2g	4192			0.454198	-1.13861			F-test w vs 2934	0.118101
190106w1r	2862	190106w1g	2345			1.22047	0.287436			t-test w vs 2934	3.12373e-12
190103w1g	4646	190103w1r	3964			0.853207	-0.229032
190103w2g	2695	190103w2r	3939			1.4616	0.547544
190103w3g	3539	190103w3r	2878			0.813224	-0.298275
190103w4g	4361	190103w4r	2033			0.466177	-1.10105
190103w5g	3136	190103w5r	2972			0.947704	-0.0774914
181216w1r	3757	181216w1g	7690			0.488557	-1.0334			F test w vs 2935	0.0100609
181216w2r	9240	181216w2g	10414			0.887267	-0.17256			t-test w vs 2935	2.16707e-11
181216w3r	2263	181216w3g	11585			0.195339	-2.35595
181216w4r	1811	181216w4g	408			4.43873	2.15015
181216w5r	3628	181216w5g	1799			2.01668	1.01198
181216w6r	6061	181216w6g	6781			0.893821	-0.161942
181216w7r	3604	181216w7g	1649			2.18557	1.12801
181012w1g	1573	181012w1r	518			0.329307	-1.60249
181012w2g	2474	181012w2r	3429			1.38601	0.470942
181012w3g	9007	181012w3r	10496			1.16532	0.220721
					mean	1.15567	-0.158705
					std dev		1.08575
					sem		0.217151
					m-sem		-0.375856	0.770648
					m+sem		0.0584455	1.04134
190106x8r	19462	190106x8g	8913			2.18355	1.12668
190106x7r	7920	190106x7g	404			19.604	4.29307
190106x6r	8648	190106x6g	6758			1.27967	0.35577
190106x5r	4782	190106x5g	4538			1.05377	0.0755575
190106x4r	12535	190106x4g	4618			2.71438	1.44062
190106x3r	18999	190106x3g	4800			3.95812	1.98482
190106x2r	9226	190106x2g	3145			2.93355	1.55265
190106x1r	10793	190106x1g	3858			2.79756	1.48417
190103x1g	1741	190103x1r	8032			4.61344	2.20584
190103x2g	4647	190103x2r	9594			2.06456	1.04583
190103x3g	7627	190103x3r	13236			1.73541	0.79528
190103x4g	9071	190103x4r	11685			1.28817	0.365324
190103x5g	4984	190103x5r	11229			2.25301	1.17185
190103x6g	6473	190103x6r	18173			2.80751	1.48929
190103x7g	2424	190103x7r	3990			1.64604	0.718999
190103x8g	3631	190103x8r	9240			2.54475	1.34753
190103x9g	6050	190103x9r	10856			1.79438	0.843486
181216x1b	2117	181216x1r	3441	181216x1g	1032	3.3343	1.73738
181216x2b	3763	181216x2r	3155	181216x2g	2880	1.09549	0.131571
181012x1g	19544	181012x1r	12451			0.637075	-0.650464
181012x2g	13084	181012x2r	49335			3.77064	1.91481
181012x3g	26223	181012x3r	36277			1.3834	0.468222
181012x4g	2521	181012x4r	14198			5.63189	2.49362
						3.17933	1.23443	2.35289
							1.00762
							0.210102
					t-test		4.13702e-05
					m-sem		1.02433	2.03401
					m+sem		1.44453	2.72175
190106c11r	669	190106c11g	11694			0.0572088	-4.12762
190106c10r	574	190106c10g	1797			0.319421	-1.64647
190106c9r	1005	190106c9g	11047			0.0909749	-3.45839
190106c8r	283	190106c8g	7844			0.0360785	-4.79272
190106c7r	226	190106c7g	8568			0.0263772	-5.24456
190106c6r	212	190106c6g	7287			0.0290929	-5.10319
190106c5r	3494	190106c5g	11729			0.297894	-1.74713
190106c4r	362	190106c4g	9867			0.0366879	-4.76855
190106c3r	135	190106c3g	7071			0.0190921	-5.71088
190106c22r	82	190106c22g	13697			0.00598671	-7.38402
190106c21r	2203	190106c21g	7329			0.300587	-1.73415
190106c20r	349	190106c20g	13046			0.0267515	-5.22424
190106c19r	829	190106c19g	10869			0.076272	-3.7127
181012c1g	23566	181012c1r	1477			0.062675	-3.99597
181012c3g	7611	181012c3r	1666			0.218894	-2.1917
181216c1b	2663	181216c1r	260			0.0976342	-3.35647
181216c2b	4469	181216c2b	187			0.0418438	-4.57884
						0.102557	-4.04574	0.0605495
							1.58088
							0.38342
					t-test		4.91899e-13
					m-sem		-4.42916	0.0464184
					m+sem		-3.66232	0.0789826
190106c18r	2947	190106c18g	15980			0.184418	-2.43895
190106c17r	679	190106c17g	6550			0.103664	-3.27001
190106c16r	146	190106c16g	6688			0.0218301	-5.51753
190106c15r	387	190106c15g	9484			0.0408056	-4.61509
190106c14r	110	190106c14g	3720			0.0295699	-5.07973
190106c13r	334	190106c13g	14915			0.0223936	-5.48077
190106c12r	373	190106c12g	7228			0.0516049	-4.27635
190106c2r	44	190106c2g	2177			0.0202113	-5.62869
190106c1r	15	190106c1g	545			0.0275229	-5.18322
190103c1g	2391	190103c1r	48			0.0200753	-5.63844
190103c2g	5603	190103c2r	692			0.123505	-3.01736
190103c3g	3184	190103c3r	55			0.0172739	-5.85526
190103c4g	3399	190103c4r	579			0.170344	-2.55348
190103c5g	2933	190103c5r	53			0.0180702	-5.79024
190103c6g	2374	190103c6r	1182			0.497894	-1.00609
190103c7g	4336	190103c7r	39			0.00899446	-6.79675
190103c8g	6383	190103c8r	216			0.0338399	-4.88513
190103c9g	2381	190103c9r	442			0.185636	-2.42945
190103c10g	4162	190103c10r	1623			0.389957	-1.35861
190103c11g	10341	190103c11r	871			0.0842278	-3.56956
190103c12g	4071	190103c12r	94			0.0230901	-5.43658
190103c13g	8344	190103c1r	6107			0.731903	-0.450275
190103c14g	6124	190103c14r	68			0.0111039	-6.4928
190103c15g	9761	190103c15r1	769			0.0787829	-3.66597
190103c16g	12626	190103c6r	9506			0.752891	-0.409487
190103c17g	1769	190103c17r	31			0.017524	-5.83452
						0.141044	-4.10309	0.0581898
							1.89416
							0.371476
					t-test		5.44289e-13
					m-sem		-4.47457	0.0449802
					m+sem		-3.73161	0.0752787
