# Supplementary material for: Roles of C/EBP class bZip proteins in the growth and cell competition of Rp (‘Minute’) mutants in Drosophila
Source: eLife. 2020 Jan 7;9:e50535. doi: 10.7554/eLife.50535 (PMC6946401; doi:10.7554/eLife.50535)
Supplement: Figure 2—source data 2. [file elife-50535-fig2-data2.xlsx]

## Sheet: Sheet1
	clone areas		clone areas	r/g	log2(r/g)	antilog r/g
190218w1ra	8902	190218w1ga	6421	1.38639	0.471332
190218w2ra	4698	190218w2ra	2669	1.76021	0.815747
190218w3ra	4898	190218w3gra	4475	1.09453	0.130305
190218w4ra	7814	190218w4ga	8760	0.892009	-0.16487
190218w5ra	7640	190218w5ga	5938	1.28663	0.363596			F test w vs Xrp1	0.384668
190218w6ra	1860	190218w6ga	7222	0.257546	-1.9571			t test w vs Xrp1	0.883335
190218w7ra	9661	190218w7ga	4311	2.24101	1.16415
190218w8ra	7710	190218w8ga	4406	1.74989	0.807261
190218w9ra	2235	190218w9ga	1600	1.39688	0.482203
190218w10ra	4546	190218w10ga	6569	0.692038	-0.531076
190310w1r	6466	190310w1g	27733	0.233152	-2.10066			F test w vs 2934	0.0649486
190310w2r	2431	190310w2g	12011	0.202398	-2.30473			t test w vs 2934	0.891332
190310w3r	3873	190310w3g	2652	1.46041	0.546371
190310w4r	22989	190310w4g	31231	0.736096	-0.442035
190310w5r	34326	190310w5g	39345	0.872436	-0.196879
190310w6r	4464	190310w6g	7746	0.576297	-0.795114			F test w vs 2935	0.862598
190310w7r	9629	190310w7g	1058	9.10113	3.18605			t test w vs 2935	0.682948
			mean	1.52583	-0.0309089	0.978803
			stdev		1.33322
			SEM		0.323354
			m-sem		-0.354263	0.782269
			m+sem		0.292445	1.22471
190218x1ra	12585	190218x1ga	6645	1.89391	0.921364
190218x2ra	6349	190218x2ga	8523	0.744925	-0.424832
190218x3ra	8030	190218x3ga	4357	1.84301	0.882065
190218x4ra	6679	190218x4ga	3630	1.83994	0.879663
190218x5ra	5045	190218x5ga	4261	1.18399	0.243662
190310x1r	2207	190310x1g	5437	0.405922	-1.30072
190310x2r	27027	190310x2g	53105	0.508935	-0.974446
190310x3r	3357	190310x3g	9549	0.351555	-1.50818
190310x4r	1270	190310x4g	4616	0.27513	-1.86181
190310x5r	8107	190310x5g	2479	3.27027	1.70941
190310x6r	5652	190310x6g	4849	1.1656	0.221074
190310x7r	5680	190310x7g	3561	1.59506	0.673608
190310x8r	9077	190310x8g	1105	8.21448	3.03817
190310x9r	1870	190310x9g	3270	0.571865	-0.806252
190310x10r	29933	190310x10g	23240	1.28799	0.365127
190310x11r	11067	190310x11g	4468	2.47695	1.30856
190310x12r	126	190310x12g	1851	0.0680713	-3.87681
190310x13r	501	190310x13g	2317	0.216228	-2.20938
190310x14r	28770	190310x14g	39638	0.725819	-0.462319
190310x15r	3714	190310x15g	3854	0.963674	-0.0533828
190310x16r	16016	190310x16g	15720	1.01883	0.0269127
190310x17r	19556	190310x17g	10513	1.86017	0.895437
190310x18r	7622	190310x18g	528	14.4356	3.85156
190310x19r	3481	190310x19g	7669	0.453905	-1.13954
190310x20r	5923	190310x20g	13963	0.424193	-1.23721
190310x21r	1895	190310x21g	6596	0.287295	-1.79939
			mean	1.84936	-0.101448	0.932097
			stdev		1.64606
			SEM		0.322819
			m-sem		-0.424268	0.745217
			m+sem		0.221371	1.16584
190218c8ra	1481	190218c8ga	4362	0.339523	-1.55842
190218c9ra	7288	190218c9ga	11274	0.646443	-0.629405
190218c10ra	8655	190218c10ga	7043	1.22888	0.297344
190218c11ra	1456	190218c11ga	494	2.94737	1.55943
190218c12ra	3125	190218c12ga	4050	0.771605	-0.374066
190218c13ra	9525	190218c13ga	9916	0.960569	-0.0580392
190218c14ra	7204	190218c14ga	6078	1.18526	0.245202
190218c15ra	2457	190218c15ga	5074	0.484233	-1.04623
190218c17ra	6816	190218c17ga	3980	1.71256	0.776157
190218c18ra	3371	190218c18ga	3194	1.05542	0.0778123
190218c19ra	6999	190218c19ga	8238	0.849599	-0.235145
190310c12r	818	190310c12g	3144	0.260178	-1.94243
190310c13r	2687	190310c13g	4843	0.554821	-0.849905
190310c14r	4707	190310c14g	638	7.37774	2.88318
190310c15r	36108	190310c15g	41897	0.861828	-0.214528
190310c16r	729	190310c16g	4227	0.172463	-2.53564
190310c17r	30456	190310c17g	23737	1.28306	0.359589
190310c18r	10675	190310c18g	5648	1.89005	0.918424
190310c19r	1040	190310c19g	3315	0.313725	-1.67243
			mean	1.31028	-0.210479	0.86425
			stdev		1.28059
			SEM		0.293788
			m-sem		-0.504267	0.705019
			m+sem		0.0833094	1.05945
190218c1ra	1930	190218c1ga	3809	0.506695	-0.980811
190218c2ra	7473	190218c2ga	6117	1.22168	0.288863
190218c3ra	3171	190218cga	4143	0.765387	-0.385738
190218c4ra	2785	190218c4ga	961	2.89802	1.53507
190218c5ra	2268	190218c5ga	2730	0.830769	-0.26748
190218c6ra	1972	190218c6ga	2609	0.755845	-0.403837
190218c7ra	3226	190218c7ga	1085	2.97327	1.57205
190310c1r	16572	190310c1g	38716	0.42804	-1.22418
190310c2r	3368	190310c2g	4637	0.726332	-0.4613
190310c3r	1113	190310c3g	9	123.667	6.95031
190310c4r	1578	190310c4g	8651	0.182407	-2.45477
190310c5r	3862	190310c5g	5685	0.679332	-0.557812
190310c6r	2709	190310c6g	14068	0.192565	-2.37658
190310c7r	2116	190310c7g	6445	0.328317	-1.60684
190310c8r	5480	190310c8g	2718	2.01619	1.01163
190310c9r	6354	190310c9g	16734	0.379706	-1.39705
190310c10r	20124	190310c10g	17179	1.17143	0.228271
			mean	8.21898	-0.0474047	0.967676
			stdev		2.21783
			SEM		0.554456
			m-sem		-1.98955	0.251817
			m+sem		2.4461	5.4494
190310c3r was excluded as an outlier. Including it does not affect the significance of results
